# Supplementary material for: Soybean GmMYB133 Inhibits Hypocotyl Elongation and Confers Salt Tolerance in Arabidopsis
Source: Front Plant Sci. 2021 Dec 23;12:764074. doi: 10.3389/fpls.2021.764074 (PMC8732865; doi:10.3389/fpls.2021.764074)
Supplement: Supplementary file 6 [file Table_1.XLSX]

## Sheet: Sheet1
Table S1 Primers used in the study
Primer ID	Primer sequence	Purpose
GmMYB133PF2-gate	ggggacaagtttgtacaaaaaagcaggcttcAGGGATCCGGTTCAACTATAGGAT	primer for GmMYB133 promoter region
GmMYB133PR1-gate	ggggaccactttgtacaagaaagctgggtcCAAGACCAAACCGAAACCTCAATC	primer for GmMYB133 promoter region
qGmMYB133F	CAAGGTGACCAGGAGCCAAT	qPCR primer for GmMYB133
qGmMYB133R	GCAGACAAAACAGCACTCTCA	qPCR primer for GmMYB133
qGmSUBI3-F	GTGTAATGTTGGATGTGTTCCC	qPCR primer for GmSUBI3
qGmSUBI3-R	ACACAATTGAGTTCAACACAAACCG	qPCR primer for GmSUBI3
GmMYB133Fgate	ggggacaagtttgtacaaaaaagcaggcttcATGGTGTCGGTGAACCCAA	gene specific primer for GmMYB133 cloning
GmMYB133Rgate	ggggaccactttgtacaagaaagctgggtcGGGAGCAGACAAAACAGCACTCTCAG	gene specific primer for GmMYB133 cloning
AtathACT8-F	TGGAGACCTCGAAAACCAGC	qPCR primer for Atactin8
AtathACT8-R	ATCCCTGCAGCTTCCATTCC	qPCR primer for Atactin8
qAtPIF4-F	GTACAGTTACCTCGATTTCCGGT	qPCR primer for AtPIF4
qAtPIF4-R	ACATCTCCATCGGCTGCATCT	qPCR primer for AtPIF4
qAtBBX24-F	ACCTGAGCCTTCCAACAACC	qPCR primer for AtBBX24
qAtBBX24-R	AGCTGTCCTTTCTTGTCGGT	qPCR primer for AtBBX24
qAtIAA19-F	TGGTGGTGACGCTGAGAAGG	qPCR primer for AtIAA19
qAtIAA19-R	CCCACTTTCGTGGTCGAAGC	qPCR primer for AtIAA19
qAtIAA29-F	GTGCTGCGTCTTGTTTGGG	qPCR primer for AtIAA29
qAtIAA29-R	CTTCGTCTTCCTCGTTGGGC	qPCR primer for AtIAA29
qAtSAUR1-F	CGGACTCTCTCAGGCAAAGC	qPCR primer for AtSAUR1
qAtSAUR1-R	TCTCTCCCACATAGACGGCC	qPCR primer for AtSAUR1
qAtSAUR21-F	GGGTGGCTTAACGATCCCTTG	qPCR primer for AtSAUR21
qAtSAUR21-R	AACTCAGAAGAACCAAATGTCGG	qPCR primer for AtSAUR21
qAtSAUR26-F	GTCTCATACTTGAACCAGCCTTTGT	qPCR primer for AtSAUR26
qAtSAUR26-R	TCATCATCATCTTCATCCTTGGAGC	qPCR primer for AtSAUR26
qAtCAX3-F	AATGTCGCTCACTCTGTCGCGG	qPCR primer for AtCAX3
qAtCAX3-R	ACGAGCCAAGCAAATCCGCTC	qPCR primer for AtCAX3
qAtEARLI1-F	CGCTGCAACAGATTGTGGTT	qPCR primer for AtEARLI1
qAtEARLI1-R	AACCTTGGATGAGCGAGCAA	qPCR primer for AtEARLI1
qAtMPK3-F	TTCCCAACTTCCCACGTCAG	qPCR primer for AtMPK3
qAtMPK3-R	TTGGCTCATCATTCGGGTCG	qPCR primer for AtMPK3
qAtAZI1-F	TTGCAACTGCAAGCCAAGTC	qPCR primer for AtAZI1
qAtAZI1-R	AGGACAGCTGTTTCCGGATG	qPCR primer for AtAZI1
qAtCCA1-F	CGGAAGCCATATACGATAACAAAGC	qPCR primer for AtCCA1
qAtCCA1-R	TCAGCCTCTTTCTCTACCTTGGA	qPCR primer for AtCCA1
qAtLHY-F	TGGCCTTATGCGAGTGTCGG	qPCR primer for AtLHY1
qAtLHY-R	AGCCCACCAAGCAGTTGCAG	qPCR primer for AtLHY1
qAtPRR5-F	TCACAGGCCGTTGCAGACAC	qPCR primer for AtPRR5
qAtPRR5-R	TCTTGGAGCATTTGGAGGCGG	qPCR primer for AtPRR5
AtPRR5-LacZ1-F	atctgtcgacctcgagCGTAAAGAGACAAGGAAAAAAGAAG	primer for AtPRR5 promoter region
AtPRR5-LacZ1-R	gagcacatgcctcgagTTTTAAAGTAATTTTCCGCGGC	primer for AtPRR5 promoter region
AtPRR5-LacZ2-F	atctgtcgacctcgagATACCATGTGTCCTTGATTTTCTTA	primer for AtPRR5 promoter region
AtPRR5-LacZ2-R	gagcacatgcctcgagAAAATCCCACTCGTGACTTTTG	primer for AtPRR5 promoter region
AtRVE8AD-F	tgcctctcccgaattcATGAGCTCGTCGCCGTCAAG	gene specific primer for AtRVE8 cloning
AtRVE8AD-R	cgagtcggccgaattcTTATGCTGATTTGTCGCTTGTTGAG	gene specific primer for AtRVE8 cloning
GmMYB133AD-F	tgcctctcccgaattcATGGTGTCGGTGAACCCAAG	gene specific primer for GmMYB133 cloning
GmMYB133AD-R	cgagtcggccgaattcCTAAGCAGACAAAACAGCACTCTCA	gene specific primer for GmMYB133 cloning
q16LHY-F	GGCCTTTCAGGCTCTGTTCT	qPCR primer for GmLHY
q16LHY-R	CCTTGGCCTCCATGGAACAT	qPCR primer for GmLHY
AtPRR5-42AD-F	tgcctctcccgaattcATGACTAGTAGCGAGGAAGTAG	gene specific primer for AtPRR5 cloning
AtPRR5-42AD-R	cgagtcggccgaattcCTATGGAGCTTGTGTGGATTGG	gene specific primer for AtPRR5 cloning
AtPIF4-Bbox-LacZi-F	atctgtcgacctcgagGTTTTCAGAGTTTTTTTAGATAAGGTAC	primer for AtPIF4 promoter region
AtPIF4-Bbox-LacZi-R	gagcacatgcctcgagCACAAAACATGAAAGAAACAGAGAA	primer for AtPIF4 promoter region
AtPIF4-EE-LacZ-R	gagcacatgcctcgagAGAGCTAATGATAACTTATGATTAA	primer for AtPIF4 promoter region
AtPIF4-EE-LacZ-F	atctgtcgacctcgagCAAAAGATTGCAGTACTGTT	primer for AtPIF4 promoter region
AtCAX3-EE-LacZ-F	atctgtcgacctcgagATCAATTAATGTCGAGCAAAT	primer for CAX3 promoter region
AtCAX3-EE-LacZ-R	gagcacatgcctcgagGTCAGTGTATGTGTTTATGTAAC	primer for CAX3 promoter region
AtAZI1-EE-LacZ-F	atctgtcgacctcgagGCTACGAACCAAGATAAATC	primer for AZI1 promoter region
AtAZI1-EE-LacZ-R	gagcacatgcctcgagGGTGTTGTAAGGGTTATTGAATAA	primer for AZI1 promoter region
AtEARLI1-EE-LacZ-F	atctgtcgacctcgagCTTAAATAGAAATGTTTTACAAAA	primer for EARLI1 promoter region
AtEARLI1-EE-LacZ-R	gagcacatgcctcgagTTTTTTCTTTCAAAAGTTTGT	primer for EARLI1 promoter region
AtMPK3-EE-LacZ-F	atctgtcgacctcgagTGTCATTATTTAACTATGGCAG	primer for MPK3 promoter region
AtMPK3-EE-LacZ-R	gagcacatgcctcgagGATCAAAGTCGAGATTCAG	primer for MPK3 promoter region
AtIAA19-EE-LacZ-F	atctgtcgacctcgagTGAACCCAAAACATACTAGAA	primer for IAA19 promoter region
AtIAA19-EE-LacZ-R	gagcacatgcctcgagCTATAGTCTATTTGTTTGCATT	primer for IAA19 promoter region
AtIAA29-EE-LacZ-F	atctgtcgacctcgagTGTGTTACTTCCTAAACTATATG	primer for IAA29 promoter region
AtIAA29-EE-LacZ-R	gagcacatgcctcgagAAATATAGATGTGGATAGATGG	primer for IAA29 promoter region
AtBBX24-EE-LacZ-F	atctgtcgacctcgagACTAGATTAGTAAACAAAACACA	primer for BBX24 promoter region
AtBBX24-EE-LacZ-R	gagcacatgcctcgagAGAGAAGATGAAAGAACAAA	primer for BBX24 promoter region
AtSAUR21-EE-LacZ-F	atctgtcgacctcgagTCTTGGTGATAAGGAATGTAT	primer for SAUR21 promoter region
AtSAUR21-EE-LacZ-R	gagcacatgcctcgagGAAGACCAGGTCTAAAAG	primer for SAUR21 promoter region
AtSAUR26-EE-LacZ-F	atctgtcgacctcgagTTCAAATCCCCCGAACTATA	primer for SAUR26 promoter region
AtSAUR26-EE-LacZ-R	gagcacatgcctcgagCACCATTGTCATATCATCAA	primer for SAUR26 promoter region
qGUS-F	ATGCCATGTTCATCTGCCCA	qPCR primer for GUS
qGUS-R	CATGAAGATGCGGACTTGCG	qPCR primer for GUS
